# Supplementary material for: Formulation Strategy for the Delivery of Cyclosporine A: Comparison of Two Polymeric Nanospheres
Source: PubMed Central journal article supplement (PMC4535033; doi:10.1038/srep13065), 2015-08-13
Supplement: srep13065-s1.pdf [file srep13065-s1.pdf]

## **Supplementary Information**

### **Formulation Strategy for the Delivery of Cyclosporine A: Comparison of Two Polymeric Nanospheres**

**Ritu Goyal<sup>1</sup>, Lauren Macri<sup>1</sup>, Joachim Kohn<sup>1\*</sup>**

**<sup>1</sup>New Jersey Center for Biomaterials, Rutgers University, Piscataway, NJ-08854**

**\*Corresponding Author**

**Joachim Kohn, Ph.D. FBSE**

**Email: [kohn@dls.rutgers.edu](mailto:kohn@dls.rutgers.edu)**

**Ph: +1 7324077510 ext. 53888**

| Drug initial Loading wt.% of polymer | Particle Size (nm)±S.D. | PDI±S.D.  |
|--------------------------------------|-------------------------|-----------|
| 0 (Empty TyroSpheres)                | 65±5                    | 0.18±0.01 |
| 10                                   | 66±4                    | 0.22±0.03 |
| 20                                   | 73±4                    | 0.17±0.02 |
| 30                                   | 71±5                    | 0.27±0.03 |
| 40                                   | 74±3                    | 0.20±0.01 |
| 60 (limit of saturation)             | 86±5                    | 0.21±0.06 |

| Solution                                   | Solubility of CSA (µg/mL)±S.D. |
|--------------------------------------------|--------------------------------|
| 1xPBS                                      | 8±1                            |
| 30 wt.% CSA-TyroSpheres suspended in 1xPBS | 8743±152                       |

| Sample                                    | R <sup>2</sup> | K    |
|-------------------------------------------|----------------|------|
| 10wt.% CSA-TyroSpheres                    | 0.62           | 0.68 |
| 30wt.% CSA-TyroSpheres                    | 0.76           | 0.52 |
| Higuchi model fit -10wt.% CSA-TyroSpheres | 0.93           | 7.71 |
| Higuchi model fit -30wt.% CSA-TyroSpheres | 0.96           | 5.80 |

**Table S4:** Optimization of sucrose concentration in dry formulation

| Sucrose Concentration (mM) | Diameter of 30 wt.% CSA-TyroSpheres (nm) $\pm$ S.D. |                          | PDI $\pm$ S.D. (Before freeze drying) | PDI $\pm$ S.D (After freeze drying) | Sf/Si |
|----------------------------|-----------------------------------------------------|--------------------------|---------------------------------------|-------------------------------------|-------|
|                            | Before Freeze Drying (Si)                           | After Freeze Drying (Sf) |                                       |                                     |       |
| 0                          | 76 $\pm$ 12                                         | 6642 $\pm$ 297           | 0.23 $\pm$ 0.02                       | 0.79 $\pm$ 0.10                     | 88    |
| 100                        | 81 $\pm$ 5                                          | 174 $\pm$ 25             | 0.19 $\pm$ 0.02                       | 0.24 $\pm$ 0.04                     | 2     |
| 200                        | 87 $\pm$ 3                                          | 116 $\pm$ 12             | 0.17 $\pm$ 0.02                       | 0.26 $\pm$ 0.04                     | 1     |
| 275                        | 92 $\pm$ 4                                          | 103 $\pm$ 6              | 0.20 $\pm$ 0.03                       | 0.24 $\pm$ 0.05                     | 1     |
| 300                        | 96 $\pm$ 4                                          | 110 $\pm$ 5              | 0.18 $\pm$ 0.04                       | 0.22 $\pm$ 0.04                     | 1     |
| 350                        | 104 $\pm$ 6                                         | 111 $\pm$ 5              | 0.19 $\pm$ 0.08                       | 0.25 $\pm$ 0.04                     | 1     |
| 400                        | 105 $\pm$ 6                                         | 109 $\pm$ 6              | 0.23 $\pm$ 0.02                       | 0.24 $\pm$ 0.05                     | 1     |
